# Supplementary material
Source: ML conference proceedings conference paper supplement (https://openreview.net/forum?id=Q0QEDhpbAK)

Training

CIFAR10

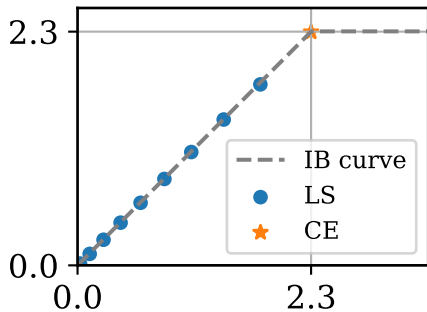

Flowers102

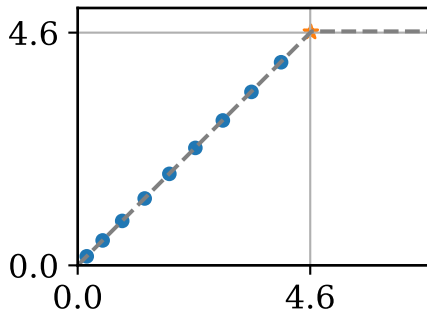

Test

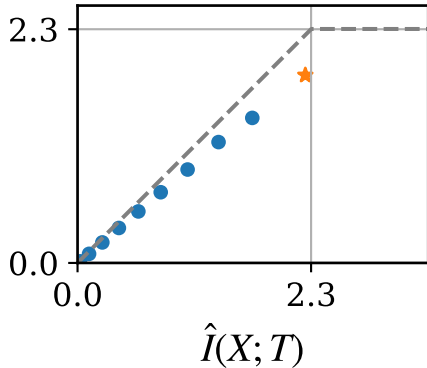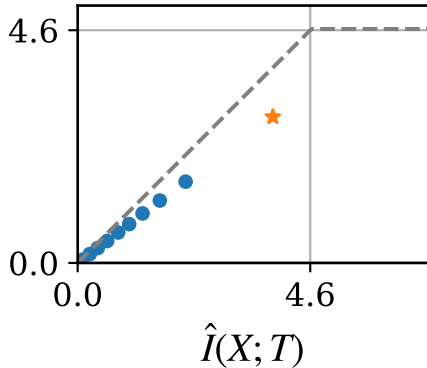

Supplement: supplementary_material [file attachment]

## Input

## Cross Entropy

## Label Smoothing

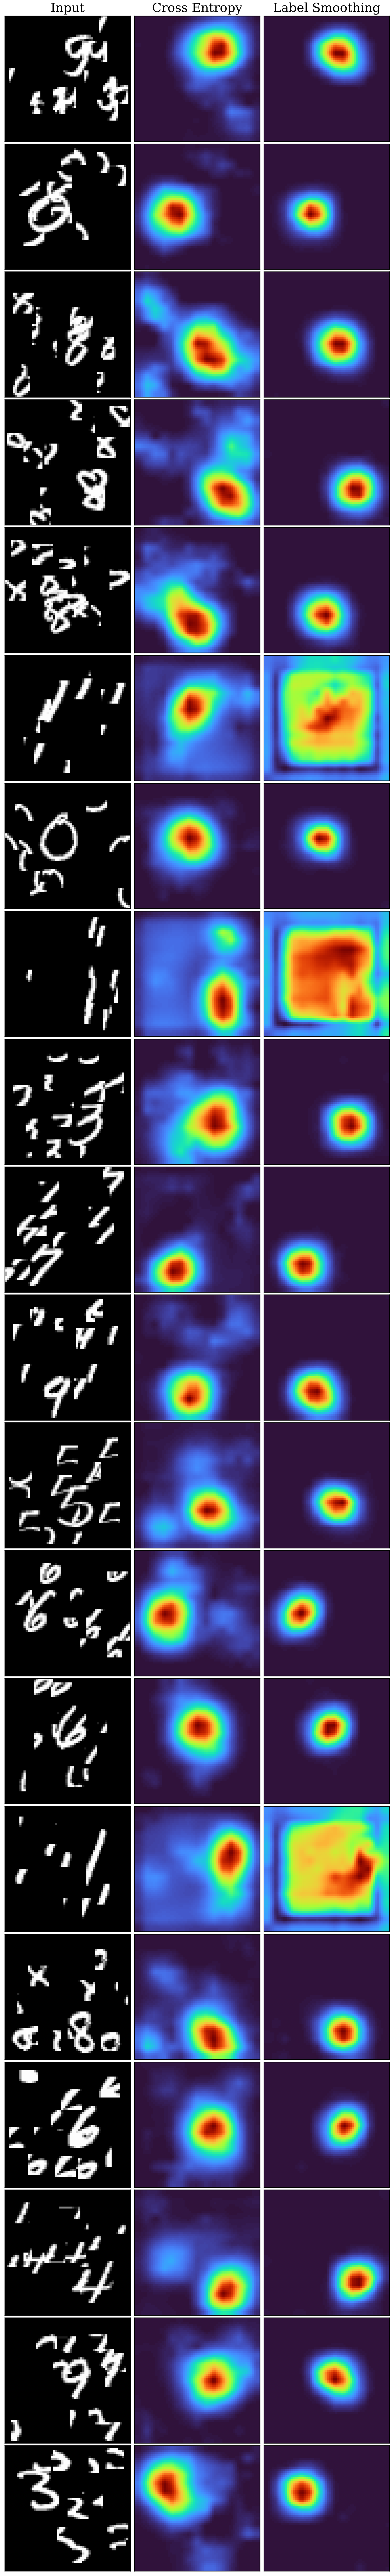

Supplement: supplementary_material [file attachment]

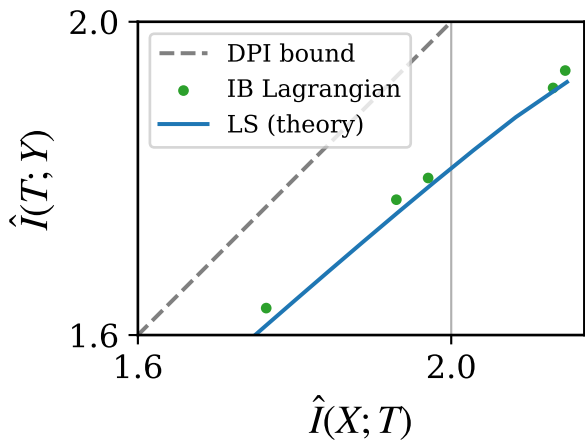

Supplement: supplementary_material [file attachment]

CIFAR10

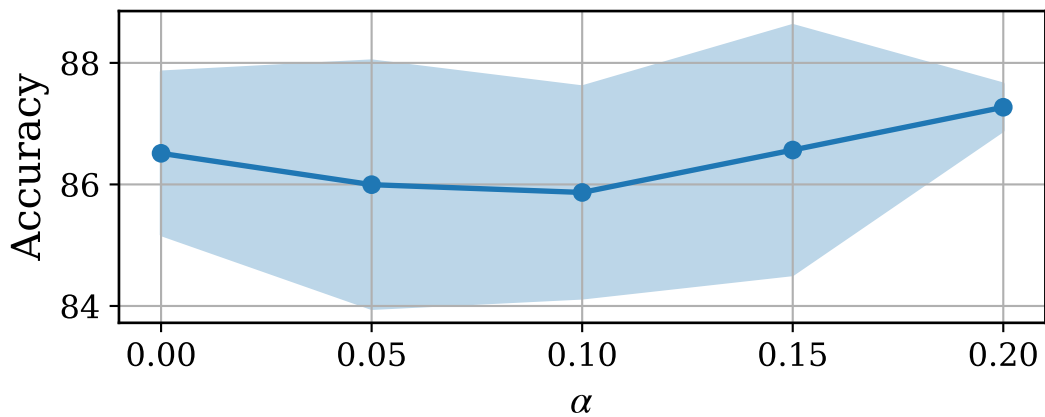

MNIST

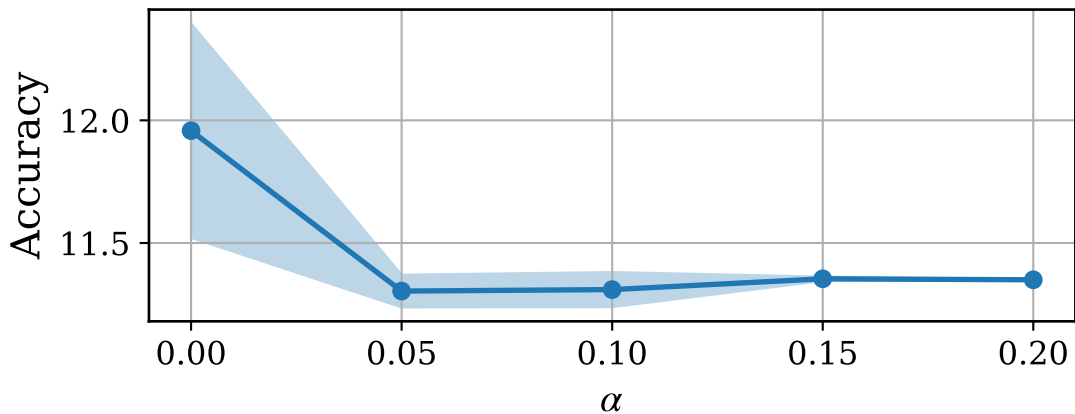

Supplement: supplementary_material [file attachment]

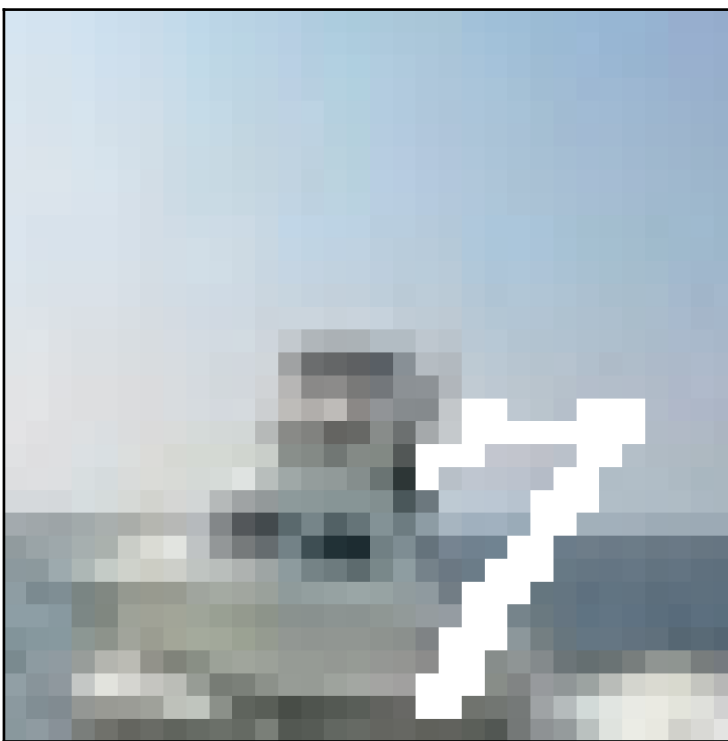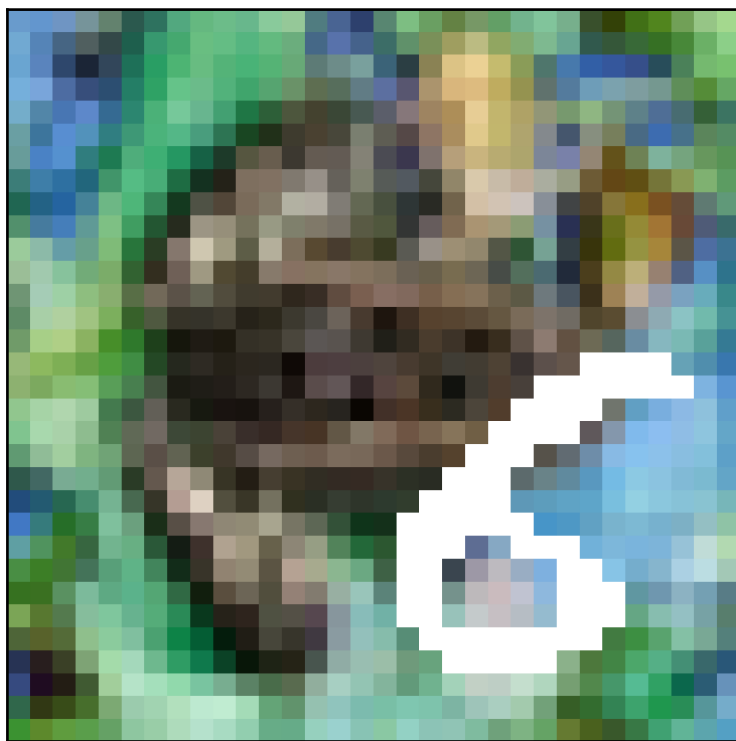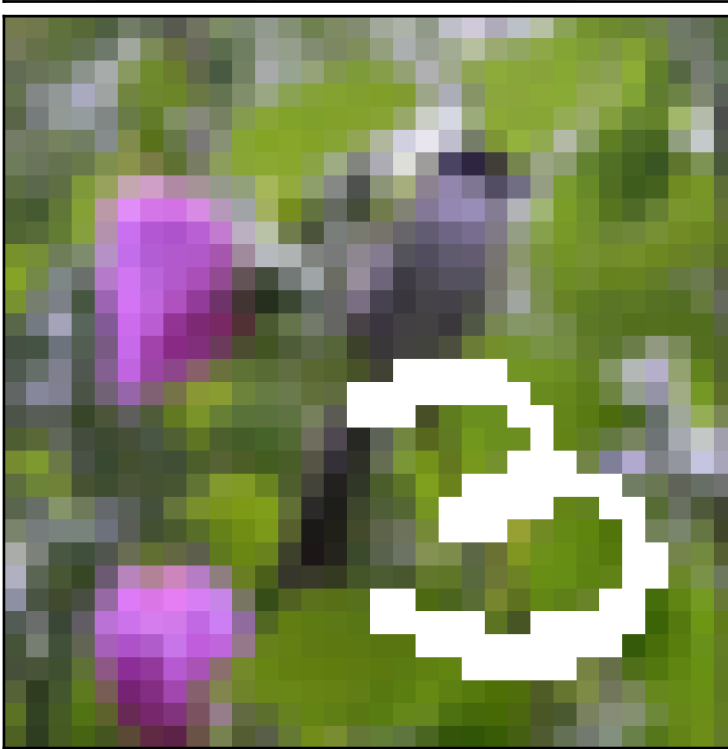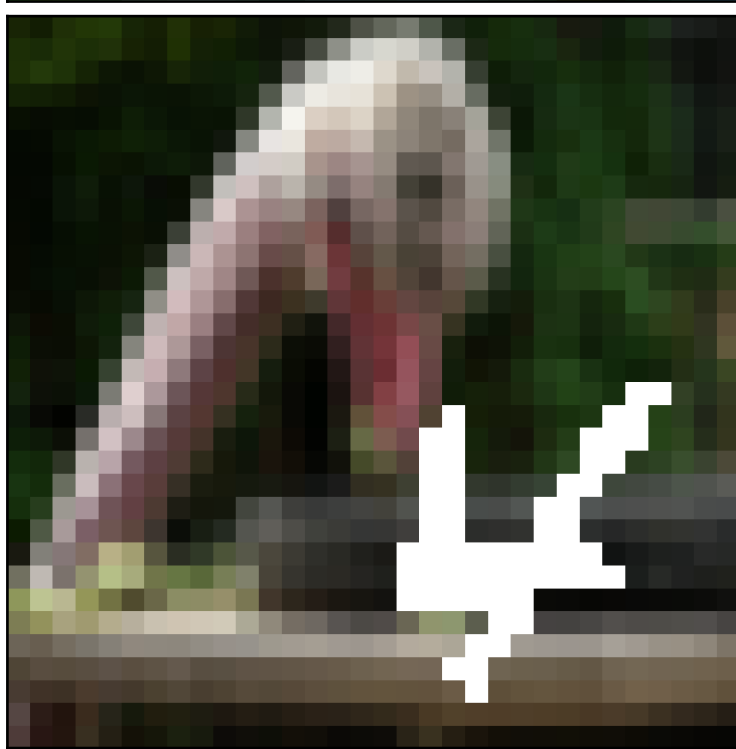

Supplement: supplementary_material [file attachment]

Input

Cross Entropy

Label Smoothing

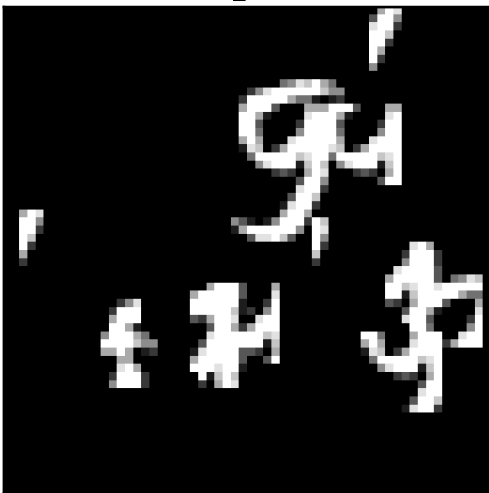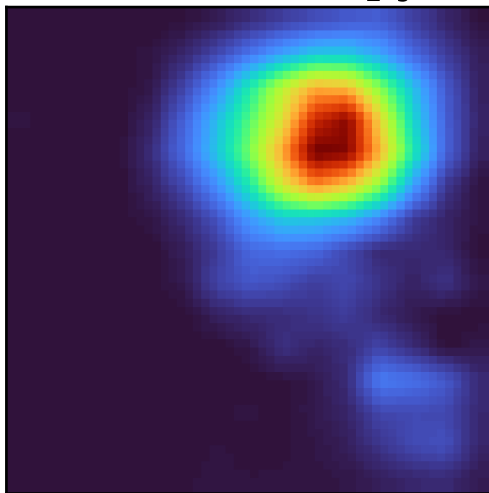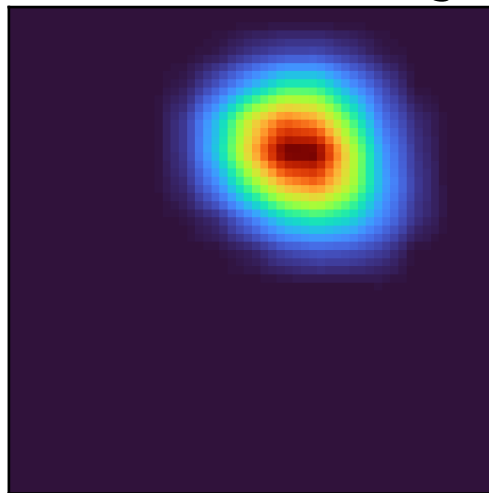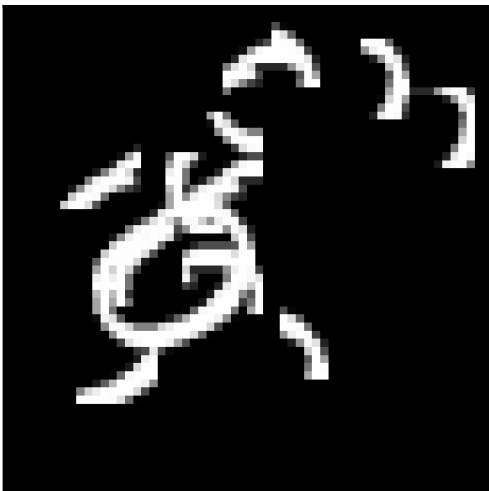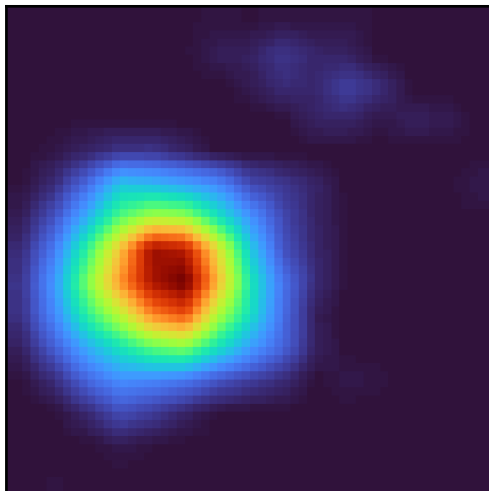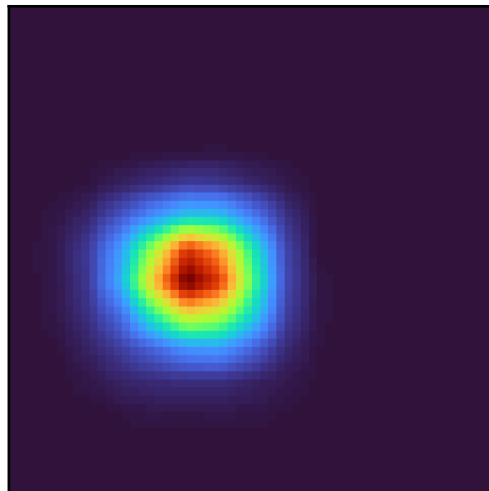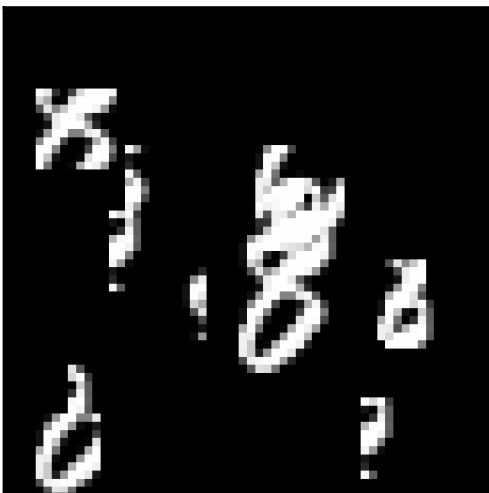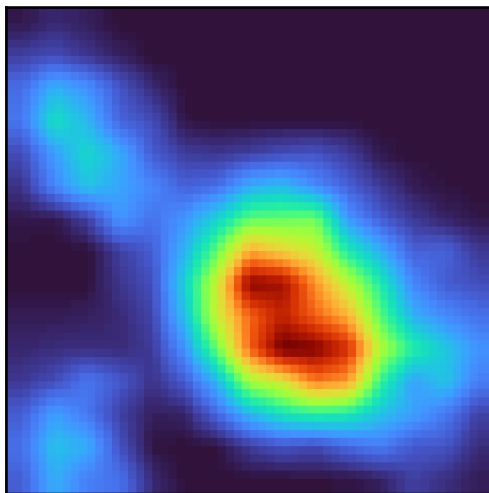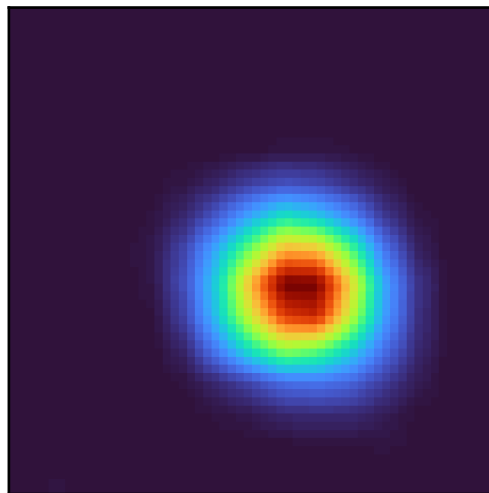

Supplement: supplementary_material [file attachment]
